# Supplementary material for: A microfluidic microinjector for toxicological and developmental studies in Drosophila embryos
Source: Royal Society of Chemistry journal article supplement (doi:10.1039/c7lc00537g), 2017-01-01
Supplement: c7lc00537g1.pdf [file c7lc00537g1.pdf]

# SUPPLEMENTAL INFORMATION

5 In order to visualize the filopodia in the embryo's heart, higher magnification section of the images presented in Figure 8 were taken and shown here. This images show the embryo's heart between sections A2-A4 (see Figure S1), where the filopodia can be clearly seen and counted across segments A4-A2 in order to calculate the percentage change in the number of filopodia, 30 min after treatment. The results showed that the  $\text{NaN}_3$  decreases number of filopodia and leading edge activity over time (30 minutes) as the concentration of the  $\text{NaN}_3$  was increased.

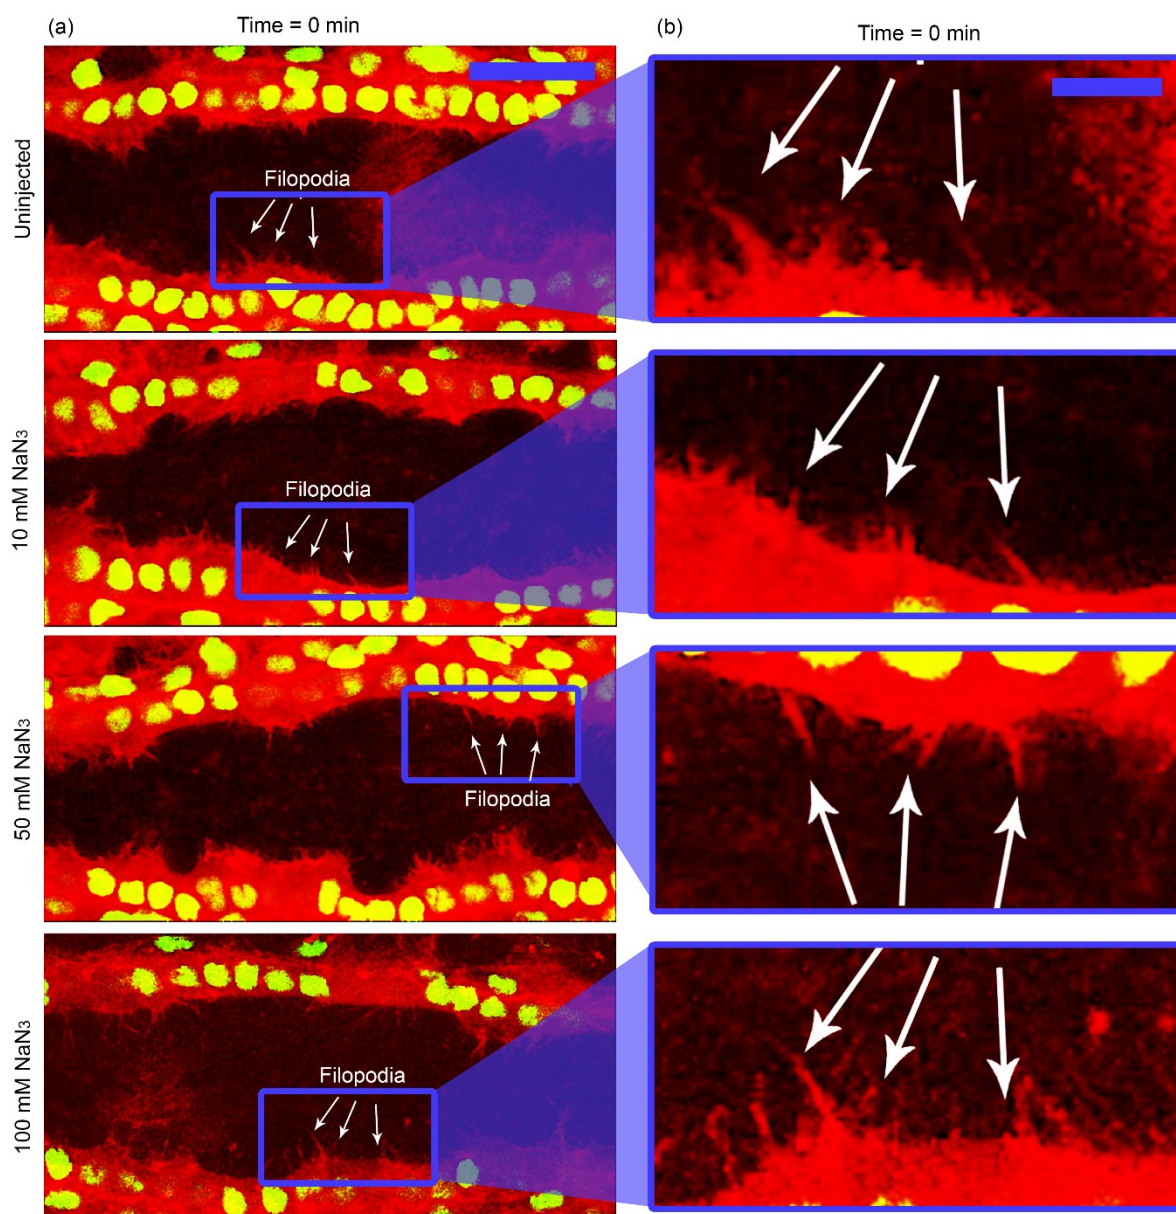

10 Figure S1: Higher magnification images of embryo's heart between sections A2-A4. The arrows indicate the filopodia in the heart. Scale bar in (a) = 20  $\mu\text{m}$  and in (b) = 5  $\mu\text{m}$ .
